# Supplementary material
Source: PubMed Central journal article supplement (PMC5359497)
Supplement: AEM.03399-16_zam999117752s1.pdf [file AEM.03399-16_zam999117752s1.pdf]

**Suppl. materials**

**Proteins with CHAD Domains (Conserved Histidine  $\alpha$ -Helical Domain) Are Attached to Polyphosphate (polyP) Granules in vivo and Constitute a Novel Family of PolyP-Associated Proteins (Phosins)**

*Tony Tumlirsch and Dieter Jendrossek\**

*Institute of Microbiology, University of Stuttgart, Germany*

**Suppl. materials Table S1:** Proteins identified in polyP granule fractions isolated from *R. eutropha*

| #  | Identified protein                                                    | Gene no       | MW     | <i>ΔphaC1</i> | <i>ΔphaXΔphaC1</i> |
|----|-----------------------------------------------------------------------|---------------|--------|---------------|--------------------|
| 1  | <b>hypothetical protein H16_A0104 (PtpA)</b>                          | A0104         | 35 kDa | x             | x                  |
| 2  | ABC transporter ATPase                                                | A0290         | 30 kDa | x             | x                  |
| 3  | hypothetical protein                                                  | A0407         | 12 kDa | x             | x                  |
| 4  | hypothetical protein                                                  | A1108         | 25 kDa | x             | x                  |
| 5  | <b>hypothetical protein (PPK2c)</b>                                   | A1212 (PPK2c) | 42 kDa | x             | x                  |
| 6  | <b>hypothetical protein (PPK2d)</b>                                   | A1271 (PPK2d) | 34 kDa | x             |                    |
| 7  | dimethylaniline monooxygenase                                         | A2109         | 49 kDa | x             |                    |
| 8  | alkaline phosphatase                                                  | A2182         | 48 kDa |               | x                  |
| 9  | <b>polyphosphate kinase (PPK1a)</b>                                   | A2437 (PPK1a) | 78 kDa | x             | x                  |
| 10 | phosphate transporter permease subunit PstC                           | A2443         | 34 kDa |               | x                  |
| 11 | transcriptional regulator                                             | B0011         | 27 kDa |               | x                  |
| 12 | EPS I polysaccharide export protein, putative tyrosine-protein kinase | B0012         | 87 kDa | x             | x                  |
| 13 | exopolysaccharide export protein                                      | B0024         | 43 kDa | x             | x                  |
| 14 | glycosyl transferase                                                  | B0025         | 45 kDa |               | x                  |
| 15 | aminotransferase                                                      | B0031         | 41 kDa | x             | x                  |
| 16 | hypothetical protein                                                  | B0037         | 38 kDa | x             | x                  |
| 17 | hypothetical protein                                                  | B0055         | 44 kDa | x             | x                  |
| 18 | putative double-glycine peptidase                                     | B0057         | 26 kDa | x             | x                  |
| 19 | LysR family transcriptional regulator                                 | B0484         | 33 kDa |               | x                  |
| 20 | LysR family transcriptional regulator                                 | B0535         | 33 kDa |               | x                  |
| 21 | phenol hydroxylase P1 protein                                         | B0540         | 37 kDa | x             | x                  |
| 22 | phenol hydroxylase P3 protein                                         | B0542         | 59 kDa | x             |                    |
| 23 | catechol 2,3-dioxygenase                                              | B0546         | 35 kDa | x             | x                  |
| 24 | 4-hydroxy-2-ketovalerate aldolase                                     | B0552         | 38 kDa | x             |                    |
| 25 | response regulator                                                    | B0621         | 25 kDa |               | x                  |
| 26 | long-chain-fatty-acid-CoA ligase                                      | B0714         | 58 kDa |               | x                  |
| 27 | L-aspartate dehydrogenase                                             | B0736         | 28 kDa |               | x                  |
| 28 | outer membrane protein (porin)                                        | B1077         | 39 kDa | x             | x                  |
| 29 | patatin-like phospholipase                                            | B1090         | 31 kDa | x             | x                  |
| 30 | transcriptional regulator                                             | B1131         | 26 kDa | x             |                    |
| 31 | transcriptional regulator                                             | B1193         | 37 kDa | x             |                    |
| 32 | AsnC family transcriptional regulator                                 | B1366         | 17 kDa |               | x                  |
| 33 | Short chain CoA dehydrogenase                                         | B1696         | 26 kDa |               | x                  |
| 34 | transcriptional regulator                                             | B1787         | 37 kDa | x             |                    |
| 35 | bb3-type cytochrome oxidase, subunit I                                | B2061         | 65 kDa | x             | x                  |
| 36 | AraC family transcriptional regulator                                 | B2258         | 37 kDa | x             | x                  |
| 37 | AraC family transcriptional regulator                                 | B2287         | 34 kDa | x             | x                  |
| 38 | ATP-dependent DNA ligase                                              | B2352         | 98 kDa | x             |                    |
| 39 | hypothetical protein                                                  | B2377         | 19 kDa |               | x                  |
| 40 | phosphatase                                                           | B2398         | 70 kDa |               | x                  |
| 41 | LysR family transcriptional regulator                                 | B2512         | 33 kDa | x             | x                  |

The polyP granule fraction and other cell fractions (membrane, membrane-associated, soluble fraction) of *R. eutropha ΔphaC1* and of *R. eutropha ΔphaX+ΔphaC1* were prepared and proteome-analyzed as described recently (1). The table shows only those proteins of the polyP fraction that were absent in all other cell fractions. The “x” indicates in which of the two strains the respective protein was identified. Proteins for which a colocalization with polyP granules was confirmed in vivo (via fusion with eYFP) are shown in bold letters. *R. eutropha ΔphaC1* was used for analysis because the presence of PHB granules in a *phaC1*-positive background complicates the isolation of polyP granules. The *R. eutropha ΔphaX+ΔphaC1* strain forms much more polyP granules than *phaX*-harboring strains (1) and was included in the analysis to increase the sensitivity of polyP protein detection. Most of the proteins shown in this table have been identified previously (1), except for the A0104 protein.

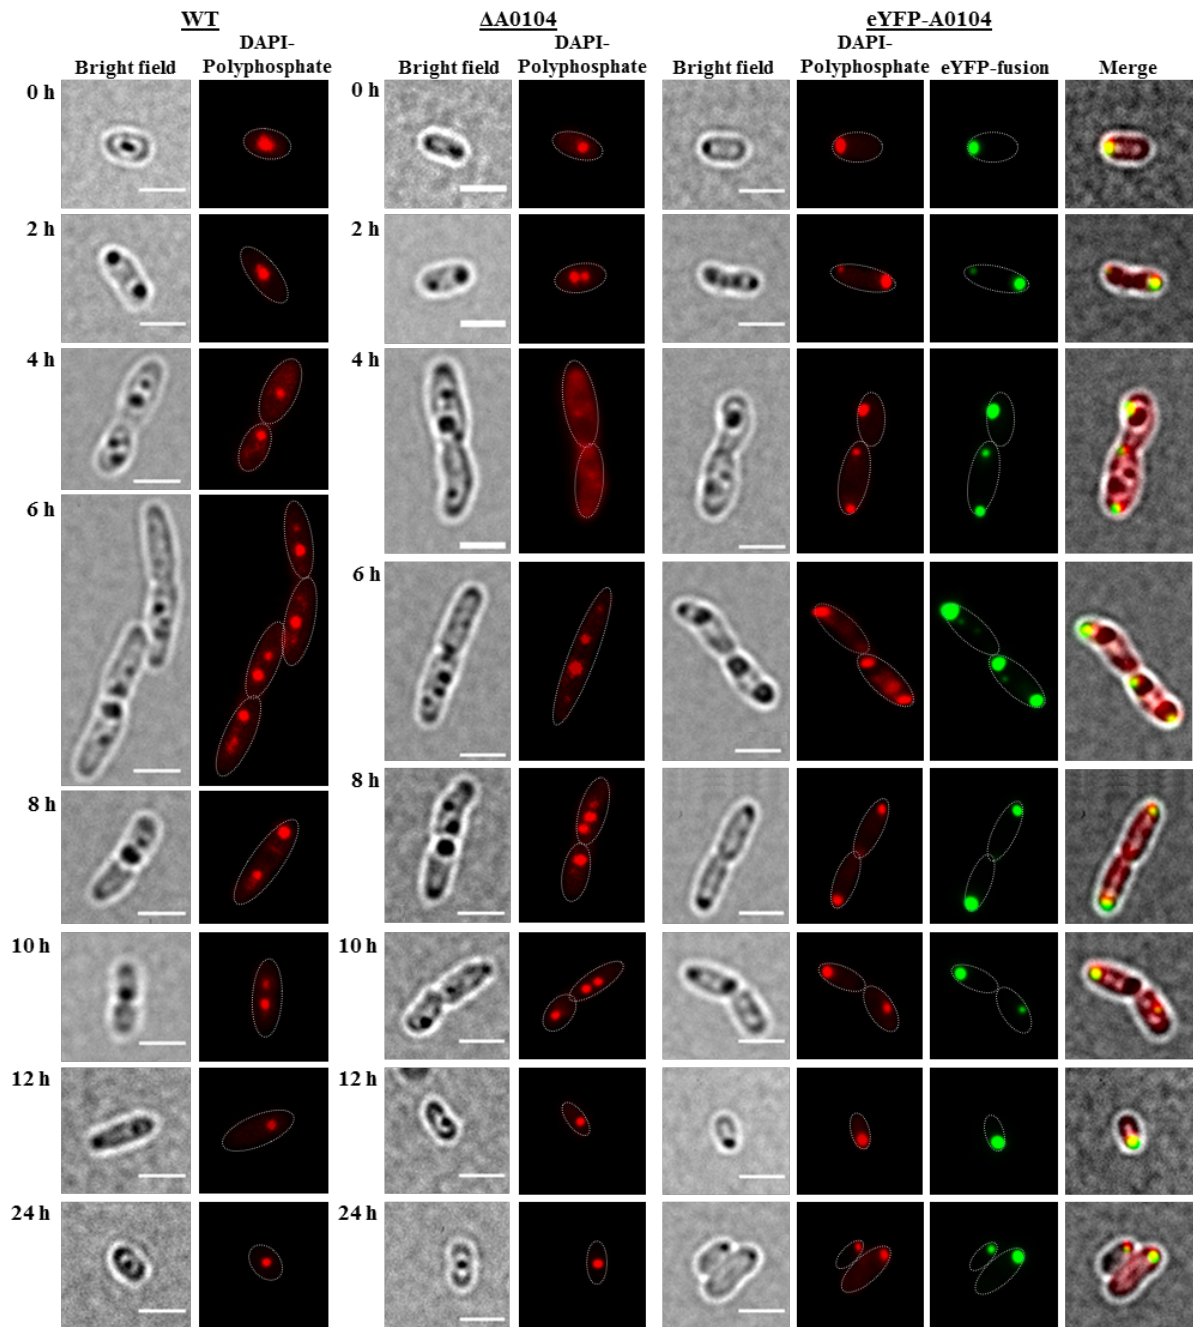

**Suppl. Fig. S2: Time course of polyP formation and localization of eYFP-A0104 in *R. eutropha*.** From left to right: *R. eutropha* wild type, *R. eutropha*  $\Delta A0104$ , and *R. eutropha* harboring pBBR1MCS2-*PphaC-eyfp-A0104*. Cells were grown in NB medium at 30°C. Samples were taken at time points as indicated, stained with DAPI and immediately imaged. For better visibility in merged figures, the DAPI-polyP specific signals (normally yellowish) are provided in red color. Note, dark globular structures visible in bright field can represent either PHB granules or polyP granules. The shape of the cells was highlighted in most fluorescent images by a white dotted line. Scale bars correspond to 2  $\mu$ m.

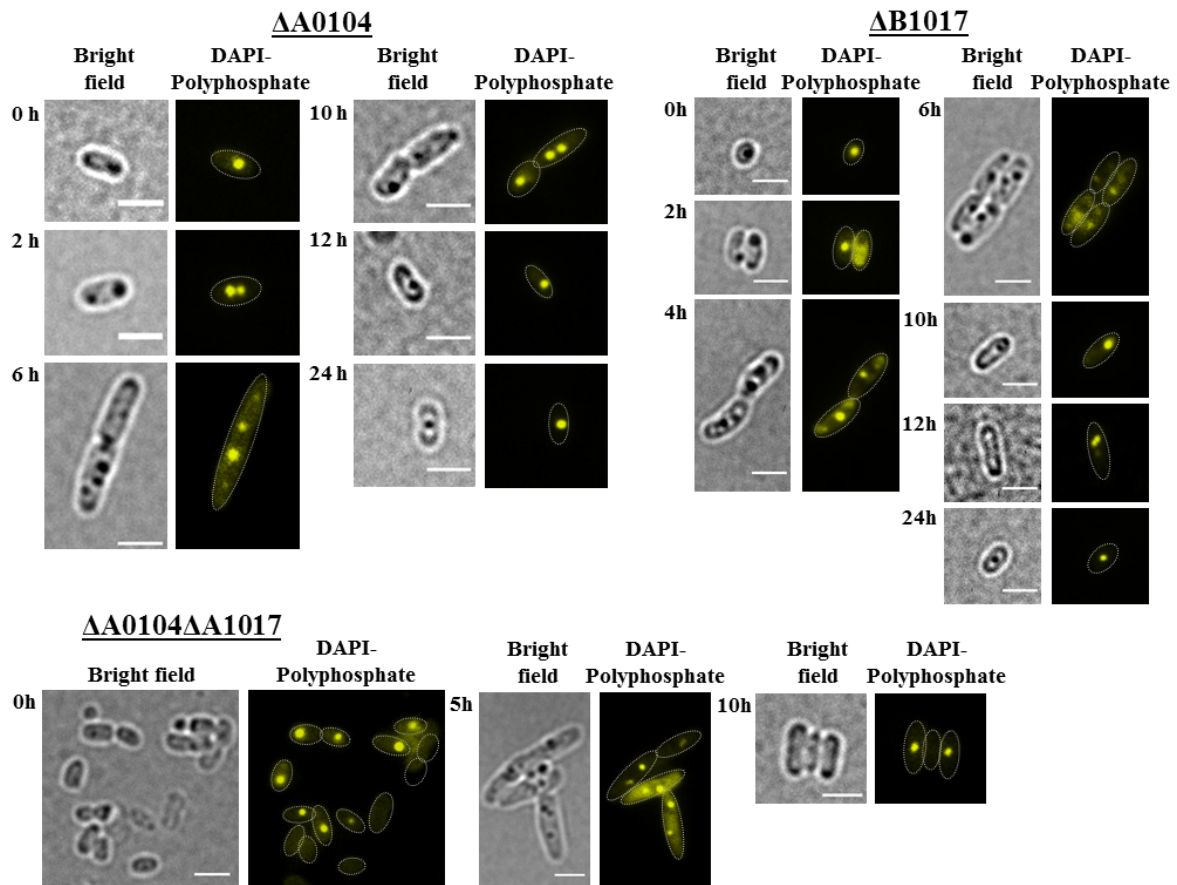

**Suppl. Fig. S3: Time course of polyP formation in  $\Delta A0104$ ,  $\Delta B1017$  and  $\Delta A0104+\Delta B1017$  cells of *R. eutropha*.** Cells were grown in NB medium at 30°C. Samples were taken at time points as indicated, stained with DAPI and immediately imaged. Note, all cells formed polyP granules. Numbers and localizations of formed polyP granules corresponded to wild type cells. Scale bar corresponds to 2  $\mu\text{m}$ .

#### REFERENCE

1. Tumlirsch T, Sznajder A, Jendrossek D. 2015. Formation of polyphosphate by polyphosphate kinases and its relationship to poly(3-hydroxybutyrate) accumulation in *Ralstonia eutropha* strain H16. *Appl Environ Microbiol* **81**:8277–8293.
